# Supplementary material for: Role of Cytokine-Inducible SH2 Domain-Containing (CISH) Protein in the Regulation of Erythropoiesis
Source: MDPI journal article supplement (doi:10.3390/biom13101510), 2023-10-12
Supplement: s1 [file s1]

**Supp. Table S1.** Red blood cell parameters in Cish WT, HET and KO C57/BL6 mice.

|     | <b>RBC</b><br>( $\times 10^5/\text{mm}^3$ ) | <b>Hb</b><br>(g/dL) | <b>HCT</b><br>(%) | <b>MCV</b><br>(fL) | <b>MCH</b><br>(g/dL) |
|-----|---------------------------------------------|---------------------|-------------------|--------------------|----------------------|
| WT  | 10.2 $\pm$ 0.6                              | 16.4 $\pm$ 0.4      | 48.7 $\pm$ 0.8    | 49.0 $\pm$ 0.4     | 16.4 $\pm$ 0.4       |
| HET | 9.9 $\pm$ 0.3                               | 16.2 $\pm$ 0.6      | 49.2 $\pm$ 1.1    | 49.3 $\pm$ 0.8     | 16.2 $\pm$ 0.2       |
| KO  | 9.6 $\pm$ 0.3                               | 15.1 $\pm$ 0.3*     | 45.0 $\pm$ 0.7*   | 50.5 $\pm$ 0.3*    | 16.8 $\pm$ 0.3       |

Data is presented as mean  $\pm$  SEM for Cish WT, HET and KO mice, with statistical significance compared to WT shown (\* $p < 0.05$ ;  $n = 4$ ). RBC: red blood cell count; Hb: hemoglobin; HCT: hematocrit; MCV: mean cell volume; MCH: mean cell hemoglobin.

**Supp. Table S2.** Differentially expressed genes in Cish KO versus WT bone marrow.

| Gene name      | Gene description                  | ID                 | logFC        | FDR         |
|----------------|-----------------------------------|--------------------|--------------|-------------|
| <i>Gm13841</i> | pseudogene                        | ENSMUSG00000083833 | -12.77634886 | 1.91E-59    |
| <i>Gm8210</i>  | pseudogene                        | ENSMUSG00000094497 | -11.39177581 | 1.91E-59    |
| <i>Mst1r</i>   | macrophage stimulating 1 receptor | ENSMUSG00000032584 | -9.38949571  | 3.84E-06    |
| <i>Aff4</i>    | AF4/FMR2 family, member 4         | ENSMUSG00000049470 | -3.222573225 | 0.030208062 |
| <i>Ryk</i>     | receptor-like tyrosine kinase     | ENSMUSG00000032547 | -2.536816371 | 2.72E-07    |
| <i>Alox15</i>  | arachidonate 15-lipoxygenase      | ENSMUSG00000018924 | 2.130038845  | 0.030208062 |
| <i>Rpl29</i>   | ribosomal protein L29             | ENSMUSG00000048758 | 3.369245988  | 2.97E-34    |

Genes with an FDR  $p < 0.05$  from a comparison of Cish WT and KO mice (n=6) are shown. ID: identification number; FC: fold-change; FDR: false discovery rate.

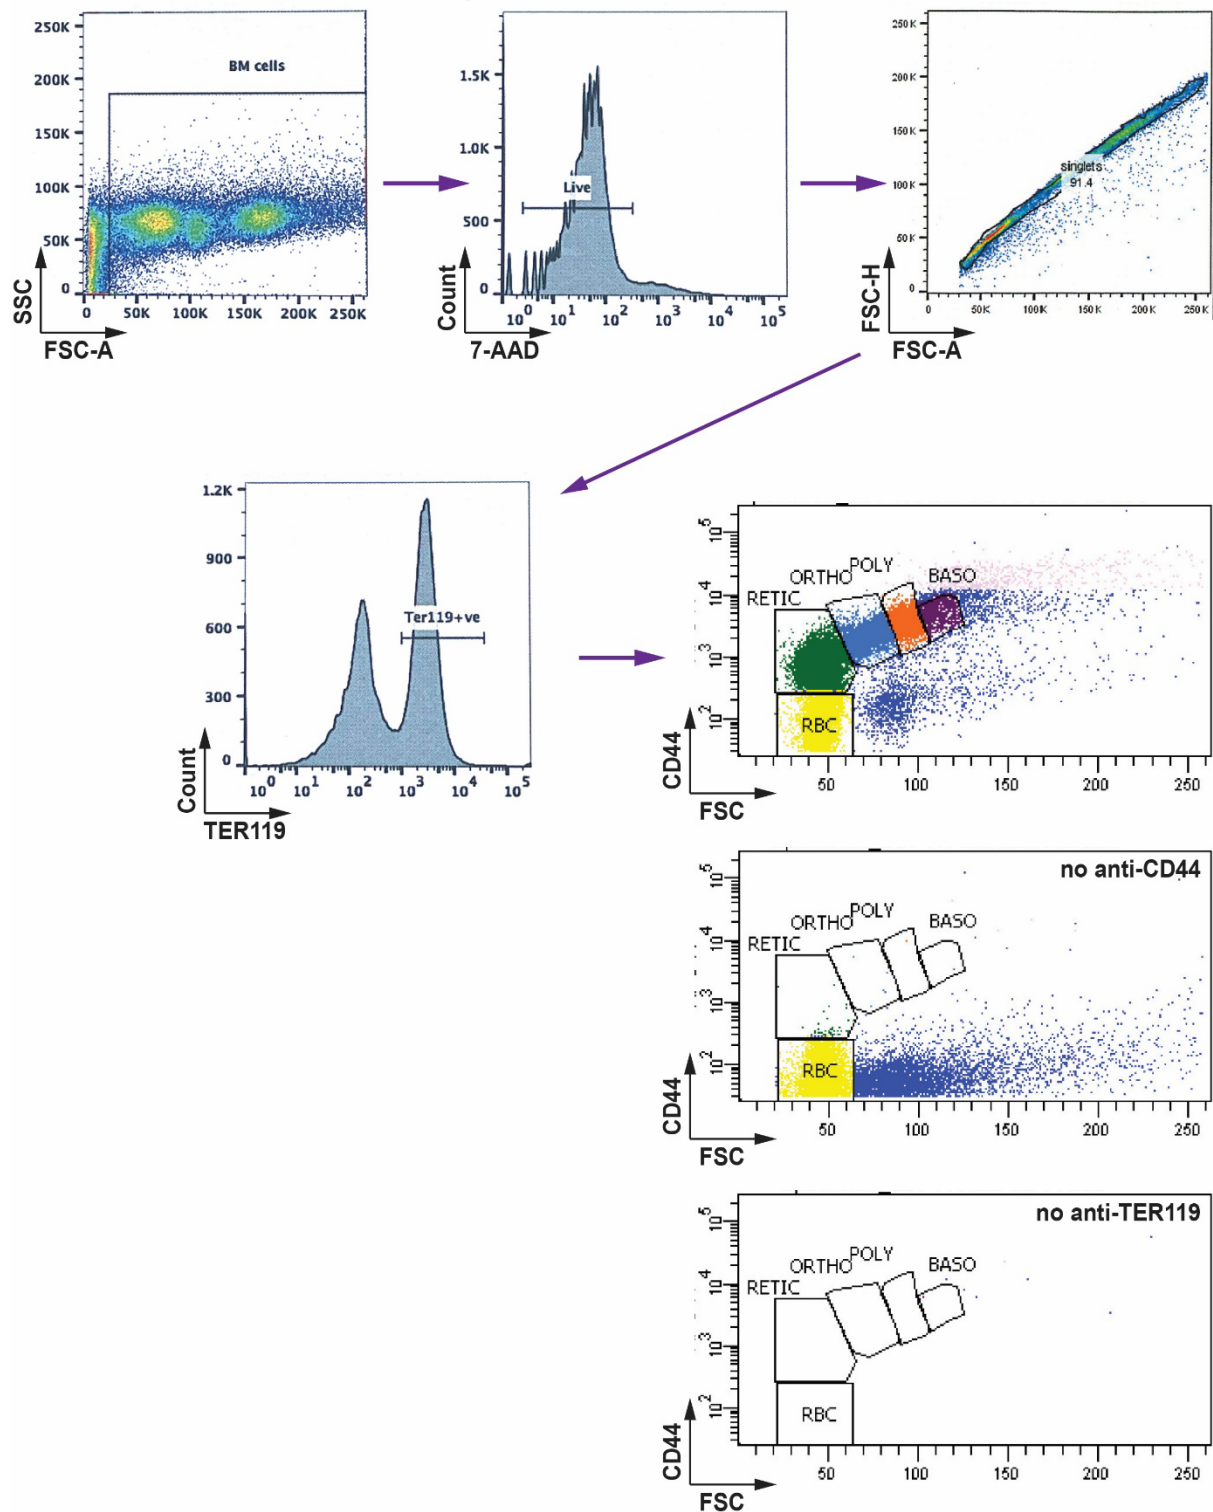

**Supp. Figure S1.** Flow cytometry strategy and controls. Strategy to quantify erythroid cell populations, showing representative plots from bone marrow samples from a Cish WT Balb/c mouse. Total cells were gated on the basis of morphology on a side scatter area (SSC) versus forward scatter area (FSC-A) plot, with viable cells gated on 7-AAD staining and single cells gated on a forward scatter height (FSC-H) versus FSC-A plot. TER119+ cells were then gated, with individual erythroid cell populations identified by gating on a CD44/FSC plot of these cells as indicated, with FMO controls, no anti-CD4 and no anti-TER119, shown below.

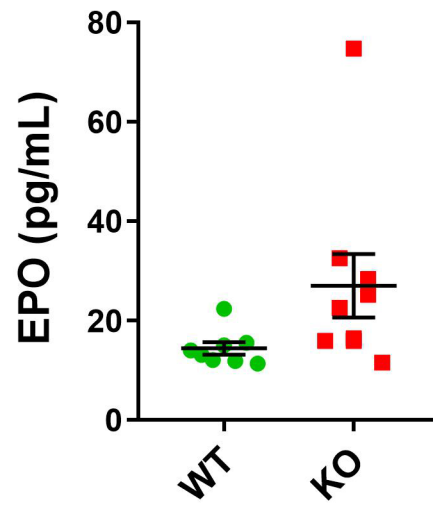

**Supp. Figure S2.** Analysis of EPO levels. Quantitation of plasma EPO concentration in Cish WT and KO mice. Shown are values for individual mice, along with mean  $\pm$  standard error of the mean (SEM). No statistical difference between WT and KO was observed.

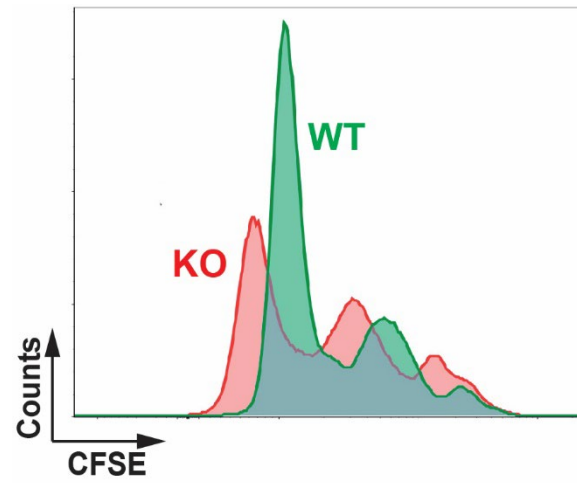

**Supp. Figure S3.** Proliferation of spleen erythroid cells. Analysis of CFSE staining as a measure of proliferation in TER119<sup>+</sup> spleen cells from representative EPO-treated Cish WT and Cish KO mice.
