# Supplementary figures and images for: Role of Cytokine-Inducible SH2 Domain-Containing (CISH) Protein in the Regulation of Erythropoiesis
Source: MDPI journal article supplement (doi:10.3390/biom13101510), 2023-10-12

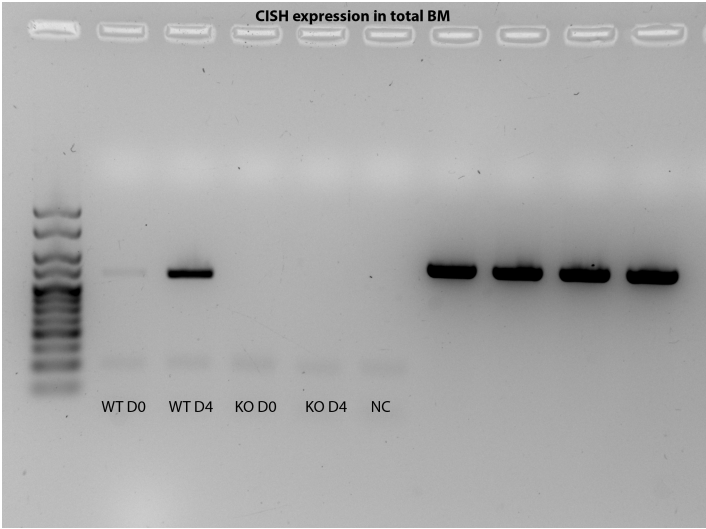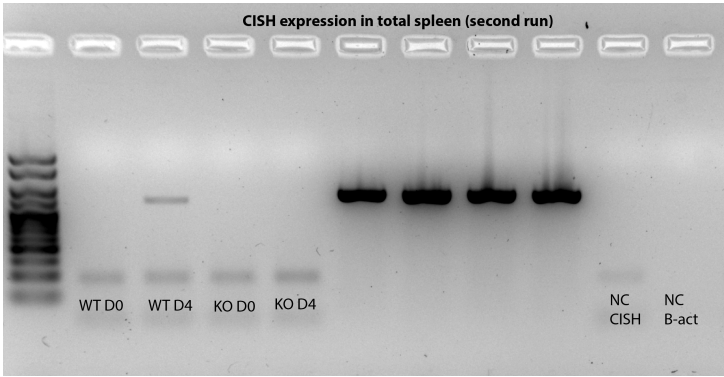

Supplement: s1 [file s1]
